# Supplementary material for: The superfamily keeps growing: Identification in trypanosomatids of RibJ, the first riboflavin transporter family in protists
Source: PubMed Central journal article supplement (PMC5404878; doi:10.1371/journal.pntd.0005513), 2017-04-13
Supplement: pntd.0005513.s008.pdf [file pntd.0005513.s008.pdf]

**S1 Table. Primers designed to clone putative riboflavin transporters of *T. cruzi*, *T. brucei* and *L. (L.) mexicana*.**

| <b>Primers</b>                     | <b>Sequence (5'- to 3'-)</b>                                                       |
|------------------------------------|------------------------------------------------------------------------------------|
| <b>F-EcoRI-<i>TcRibJ</i></b>       | CGGAATTCATGTTGCCATGTTTCACACGG                                                      |
| <b>R-HindIII-<i>TcRibJ</i></b>     | CCCAAGCTTTTACGCAAGTTTTGCTTCTGC                                                     |
| <b>F-<i>TcRibJ</i>-NdeI-6xHis</b>  | TAAC <b>TTAAGAAGGAGATATACATATGCACCACCACCACCACC</b> ACTTGCCATGTTTCACACGGAA <b>G</b> |
| <b>R-<i>TcRibJ</i>-BamHI</b>       | AGCTTGT <b>CGACGGAGCTCGAATTCGGATCCTTACGCAAGTTTTGCTTCTGC</b>                        |
| <b>F-<i>TbRibJ</i>-NdeI-6xHis</b>  | TAAC <b>TTAAGAAGGAGATATACATATGCACCACCACCACCACC</b> ACCTTCCAAGTTTCACCCGTAA <b>A</b> |
| <b>R-<i>TbRibJ</i>-BamHI</b>       | AGCTTGT <b>CGACGGAGCTCGAATTCGGATCCTCACATAATCTCAACAAGTTT</b>                        |
| <b>F-<i>LmiRibJ</i>-NdeI-6xHis</b> | TAAC <b>TTAAGAAGGAGATATACATATGCACCACCACCACCACC</b> ACCAGATCTACGAGGCATGCA <b>AG</b> |
| <b>R-<i>LmiRibJ</i>-BamHI</b>      | AGCTTGT <b>CGACGGAGCTCGAATTCGGATCCTCAGCCTGCCTCACCACGCG</b>                         |

Boldface: genomic sequences. Regular: vector sequences. Underlined: restrictions enzymes cleavage site. Italic: 6xHis tag sequence.
