# Supplementary material for: The superfamily keeps growing: Identification in trypanosomatids of RibJ, the first riboflavin transporter family in protists
Source: PubMed Central journal article supplement (PMC5404878; doi:10.1371/journal.pntd.0005513), 2017-04-13
Supplement: pntd.0005513.s009.pdf [file pntd.0005513.s009.pdf]

**S2 Table. Identification of potential RibJ transporters in trypanosomatids in totally assembled genomes.**

| Parasite                                         | Host                                                   | Accession number      | MFS (e-value) <sup>a</sup> | Region <sup>b</sup> | TcRibJ similarity (%) <sup>c</sup> |
|--------------------------------------------------|--------------------------------------------------------|-----------------------|----------------------------|---------------------|------------------------------------|
| <i>Trypanosoma cruzi</i>                         | <i>Homo sapiens</i> (Chagas disease)                   | TcCLB.509885.70       | Yes (1.7 e-16)             | 19-288              | 100                                |
| <b>A</b> <i>Trypanosoma brucei</i>               | <i>Homo sapiens</i> (African trypanosomiasis)          | Tb927.5.470           | Yes (3.2 e-27)             | 19-337              | 62.0                               |
| <i>Leishmania (Leishmania) mexicana</i>          | <i>Homo sapiens</i> (cutaneous leishmaniasis)          | LmxM.05.0480          | Yes (7.2 e-19)             | 36-218              | 49.0                               |
| <i>Trypanosoma evansi</i>                        | <i>Bubalus bubalis</i> (water buffalo)                 | TevSTIB805.5.460      | Yes (3.6 e-27)             | 19-377              | 62.5                               |
| <i>Trypanosoma congolense</i>                    | <i>Bos</i> spp. (African bovine trypanosomiasis)       | TcIL3000_0_01740      | Yes (7.6 e-29)             | 19-354              | 60.5                               |
| <b>B</b> <i>Trypanosoma grayi</i>                | <i>Glossina palpalis</i> (tsetse fly)                  | Tgr.1850.1000         | Yes (9.4 e-24)             | 19-295              | 76.1                               |
| <i>Trypanosoma rangeli</i>                       | <i>Homo sapiens</i> (asymptomatic)                     | TRSC58_01116          | Yes (1.3 e-21)             | 19-288              | 83.3                               |
| <i>Trypanosoma vivax</i>                         | <i>Bos taurus</i>                                      | TvY486_0500070        | Yes (8.0 e-27)             | 20-291              | 67.6                               |
| <i>Leishmania (Leishmania) tropica</i>           | <i>Homo sapiens</i> (cutaneous leishmaniasis)          | LTRL590_050009300     | Yes (1.1 e-19)             | 39-218              | 49.8                               |
| <i>Leishmania (Leishmania) aethiopica</i>        | <i>Homo sapiens</i> (cutaneous leishmaniasis)          | LAEL147_000064200     | Yes (9.2 e-20)             | 39-218              | 49.8                               |
| <i>Leishmania (Viannia) braziliensis</i>         | <i>Homo sapiens</i> (cutaneous leishmaniasis)          | LBRM2903_050010000    | Yes (2.0 e-22)             | 33-375              | 50.9                               |
| <i>Leishmania (Viannia) panamensis</i>           | <i>Homo sapiens</i> (cutaneous leishmaniasis)          | LPAL13_050009400      | Yes (6.7 e-23)             | 33-373              | 50.8                               |
| <i>Leishmania</i> sp. MAR LEM2494                | <i>Homo sapiens</i> (cutaneous leishmaniasis)          | LMARLEM2494_050009900 | Yes (2.3 e-15)             | 33-392              | 48.7                               |
| <i>Leishmania (Leishmania) major</i>             | <i>Homo sapiens</i> (cutaneous leishmaniasis)          | LmjF.05.0480          | Yes (3.0 e-17)             | 39-393              | 49.8                               |
| <b>C</b> <i>Leishmania (Leishmania) donovani</i> | <i>Homo sapiens</i> (visceral leishmaniasis)           | LdBPK_050480.1        | Yes (8.7 e-16)             | 39-337              | 49.7                               |
| <i>Leishmania (Leishmania) infantum</i>          | <i>Homo sapiens</i> (infantile visceral leishmaniasis) | LinJ.05.0480          | Yes (7.4 e-16)             | 39-337              | 49.7                               |
| <i>Leishmania (Leishmania) gerbelli</i>          | <i>Rhombomys opimus</i> (gerbil)                       | LGELEM452_050009800   | Yes (1.2 e-16)             | 36-400              | 49.6                               |
| <i>Leishmania (Leishmania) turanica</i>          | <i>Rhombomys opimus</i> (gerbil)                       | LTULEM423_050009600   | Yes (9.5 e-17)             | 39-396              | 50.0                               |
| <i>Leishmania (Leishmania) arabica</i>           | <i>Psammomys obesus</i> (rodent)                       | LARLEM1108_050009800  | Yes (1.1 e-16)             | 36-396              | 49.5                               |
| <i>Leishmania (Sauroleishmania) tarentolae</i>   | <i>Tarentola mauritanica</i> (lizard)                  | LtaP05.0490           | Yes (4.1 e-16)             | 33-383              | 49.2                               |
| <i>Leishmania enriettii</i> complex              | Rodents                                                | ENLEM3045_050009900   | Yes (1.2 e-20)             | 44-509              | 48.1                               |
| <b>D</b> <i>Endotrypanum monterogeii</i>         | <i>Choloepus hoffmanni</i> (sloth)                     | EMOLV88_050009300     | Yes (3.3 e-22)             | 37-495              | 50.5                               |
| <i>Crithidia fasciculata</i>                     | <i>Anopheles quadrimaculatus</i> (mosquito)            | CFAC1_020011500       | Yes (1.2 e-15)             | 36-374              | 51.9                               |
| <b>E</b> <i>Leptomonas pyrrhocoris</i>           | <i>Pyrrhocoris apterus</i> (european bug)              | LpyrH10_07_0560       | Yes (1.9 e-23)             | 36-364              | 52.6                               |
| <i>Leptomonas seymouri</i>                       | <i>Dysdercus suturellus</i> (red bug)                  | Lsey_0441_0040        | Yes (7.5 e-19)             | 33-480              | 52.4                               |

Identification of putative riboflavin transporters using TcRibJ as query in Trityps database. <sup>a</sup>Predicted domains in Pfam server. <sup>b</sup>Regions included in the MFS domain. <sup>c</sup>Similarity with TcRibJ obtained by ClustalW.

A: human parasites used in this work.

B: other parasites from the *Trypanosoma* genus.

C: other parasites from the *Leishmania* genus

D: other mammalian parasites.

E: parasites exclusive from insects.
