# Supplementary material for: The superfamily keeps growing: Identification in trypanosomatids of RibJ, the first riboflavin transporter family in protists
Source: PubMed Central journal article supplement (PMC5404878; doi:10.1371/journal.pntd.0005513), 2017-04-13
Supplement: pntd.0005513.s010.pdf [file pntd.0005513.s010.pdf]

**S3 Table. Identification of potential RibJ transporters in kinetoplastids with partially assembled genomes.**

| Parasite                                       | Host                                                                     | Accession number<br>(contig or scaffold) | MFS (e-value) <sup>a</sup> | Region <sup>b</sup> | TcRibJ<br>similarity (%) <sup>c</sup> | Reference |
|------------------------------------------------|--------------------------------------------------------------------------|------------------------------------------|----------------------------|---------------------|---------------------------------------|-----------|
| <b>A</b> <i>Trypanosoma equiperdum</i>         | Equines (venereal disease dourine)                                       | CZPT01000402                             | Yes (3.2 e-27)             | 19-377              | 62.5                                  | NP        |
| <b>B</b> <i>Leishmania (Viannia) peruviana</i> | <i>Homo sapiens</i> (visceral leishmaniasis)                             | LN609254.1                               | Yes (5.2 e-23)             | 33-375              | 50.8                                  | [1]       |
| <i>Angomonas desouzai</i>                      | <i>Ornithia obesa</i> (fly)                                              | AUXL01001118                             | Yes (6.9 e-20)             | 35-309              | 55.4                                  | [2]       |
| <i>Angomonas deanei</i>                        | <i>Zelus leucogrammus</i> (hemiptera)                                    | AUXM01000876                             | Yes (1.3 e-24)             | 34-419              | 56.6                                  | [2]       |
| <i>Lotmaria passim</i>                         | <i>Apis mellifera</i> (honey bee)                                        | AHIJ01002325                             | Yes (1.4 e-16)             | 35-371              | 50.2                                  | [3]       |
| <b>C</b> <i>Crithidia acanthocephali</i>       | <i>Acanthocephala femorata</i> (fly)                                     | AUXI01000737                             | Yes (6.6 e-18)             | 36-370              | 51.5                                  | [2]       |
| <i>Herpetomonas muscarum</i>                   | <i>Musca domestica</i> (fly)                                             | AUXJ01001726                             | Yes (2.5 e-18)             | 38-355              | 49.8                                  | [2]       |
| <i>Strigomonas oncopelti</i>                   | <i>Zelus leucogrammus</i> (hemiptera)                                    | AUXK01003753                             | Yes (9.1 e-25)             | 33-474              | 50.4                                  | [2]       |
| <i>Strigomonas galati</i>                      | -                                                                        | AUXN01003492                             | Yes (7.6 e-18)             | 26-330              | 50.9                                  | [2]       |
| <i>Strigomonas culicis</i>                     | <i>Aedes vexans</i> (mosquito)                                           | AUXH01000639                             | Yes (8.1 e-19)             | 38-332              | 52.6                                  | [2]       |
| <i>Phytomonas serpens</i> 9T                   | <i>Solanum lycopersicum</i> (isolate from tomato)                        | AIHY01002387                             | Yes (5.4 e-21)             | 74-412              | 38.1                                  | [4]       |
| <b>D</b> <i>Phytomonas</i> sp. isolate Hart1   | phloem-restricted pathogenic isolate from a diseased coconut from Guiana | HF955203<br>CAVR020000000*               | Yes (1.7 e-22)             | 55-370              | 37.7                                  | [5]       |
| <i>Phytomonas</i> sp. isolate EM1              | asymptomatic latex isolate from <i>Euphorbia</i>                         | HF955064<br>CAVQ010000000*               | Yes (3.2 e-28)             | 61-429              | 39.9                                  | [5]       |
| <i>Bodo saltans</i>                            | None (free-living kinetoplastid)                                         | BS47350                                  | Yes (5.6 e-14)             | 12-413              | 39.9                                  | [6]       |
| <b>E</b> <i>Trypanoplasma borreli</i>          | Cyprinid fish                                                            | NODE_24555_length_<br>1382_cov_9.405933  | Yes (6.0 e-24)             | 35-307              | 28.2                                  | NP        |

Identification of putative riboflavin transporters using TcRibJ as query in NCBI database. Currently, these genomes are partially assembled. <sup>a</sup>Predicted MSF domains by Pfam server. <sup>b</sup>Regions included in the MFS domain. <sup>c</sup>Similarity with TcRibJ obtained by ClustalW. NP: Not published.

A: other parasites from the *Trypanosoma* genus.

B: other parasites from the *Leishmania* genus.

C: parasite exclusive from insects.

D: phytoparasites.

E: parasite belonging to different order than Trypanosomatida.

### Supplementary References

- Valdivia HO, Reis-Cunha JL, Rodrigues-Luiz GF, Baptista RP, Baldeviano GC, Gerbasí R V., et al. Comparative genomic analysis of *Leishmania (Viannia) peruviana* and *Leishmania (Viannia) braziliensis*. *BMC Genomics*. *BMC Genomics*; 2015;16: 715. doi:10.1186/s12864-015-1928-z
- Alves JMP, Klein CC, da Silva FM, Costa-Martins AG, Serrano MG, Buck GA, et al. Endosymbiosis in trypanosomatids: the genomic cooperation between bacterium and host in the synthesis of essential amino acids is heavily influenced by multiple horizontal gene transfers. *BMC Evol Biol*. 2013;13: 190. doi:10.1186/1471-2148-13-190
- Runckel C, DeRisi J, Flenniken ML. A Draft Genome of the Honey Bee Trypanosomatid Parasite *Crithidia mellificae*. *PLoS One*. 2014;9: e95057. doi:10.1371/journal.pone.0095057
- Koreny L, Sobotka R, Kovarova J, Gnypova A, Flegontov P, Horvath A, et al. Aerobic kinetoplastid flagellate *Phytomonas* does not require heme for viability. *Proc Natl Acad Sci U S A*. 2012;109: 3808–3813. doi:10.1073/pnas.1201089109/-/DCSupplemental.www.pnas.org/cgi/doi/10.1073/pnas.1201089109
- Porcel BM, Deneud F, Oppendoes F, Noel B, Madoui M-AA, Hammarton TC, et al. The Streamlined Genome of *Phytomonas* spp. Relative to Human Pathogenic Kinetoplastids Reveals a Parasite Tailored for Plants. *PLoS Genet*. 2014;10: e1004007. doi:10.1371/journal.pgen.1004007
- Jackson AP, Quail M a, Berriman M. Insights into the genome sequence of a free-living Kinetoplastid: *Bodo saltans* (Kinetoplastida: Euglenozoa). *BMC Genomics*. 2008;9: 594. doi:10.1186/1471-2164-9-594
