# Supplementary material for: The superfamily keeps growing: Identification in trypanosomatids of RibJ, the first riboflavin transporter family in protists
Source: PubMed Central journal article supplement (PMC5404878; doi:10.1371/journal.pntd.0005513), 2017-04-13
Supplement: pntd.0005513.s011.pdf [file pntd.0005513.s011.pdf]

**S4 Table. Amino acid sequence of riboflavin transporters used to construct the phylogenetic tree from Fig. 2B.**

| Classification                  | Species                               | Name           | Accession number | Reference |
|---------------------------------|---------------------------------------|----------------|------------------|-----------|
| Mammals                         | <i>Homo sapiens</i>                   | RFVT1          | Q9NWF4.2         | [1]       |
|                                 | <i>Homo sapiens</i>                   | RFVT3          | Q9NQ40.4         | [1]       |
|                                 | <i>Homo sapiens</i>                   | RFVT2          | Q9HAB3.1         | [1]       |
|                                 | <i>Mus musculus</i>                   | RFVT2          | Q9D8F3.1         | [2]       |
|                                 | <i>Pan paniscus</i>                   | member 1       | XP_003810223.1   | Predicted |
|                                 | <i>Pongo abelii</i>                   | member 2       | XP_002833179.2   | Predicted |
|                                 | <i>Macaca fascicularis</i>            | member 2       | XP_005564405.1   | Predicted |
|                                 | <i>Macaca nemestrina</i>              | member 1       | XP_011724203.1   | Predicted |
|                                 | <i>Equus caballus</i>                 | member 1       | XP_014583611.1   | Predicted |
|                                 | <i>Tursiops truncatus</i>             | member 2       | XP_004319077.1   | Predicted |
|                                 | <i>Orcinus orca</i>                   | member 2       | XP_012386875.1   | Predicted |
|                                 | <i>Bos mutus</i>                      | member 2       | XP_014334325.1   | Predicted |
|                                 | <i>Ictidomys tridecemlineatus</i>     | member 2       | XP_005316095.1   | Predicted |
|                                 | <i>Cricetulus griseus</i>             | member 2       | XP_003507685.1   | Predicted |
|                                 | <i>Equus przewalskii</i>              | member 2       | XP_008508436.1   | Predicted |
|                                 | <i>Ceratotherium simum simum</i>      | member         | XP_004443067.1   | Predicted |
|                                 | <i>Ratus norvegicus</i>               | member 3       | NP_001032275.1   | Predicted |
|                                 | <i>Myotis brandtii</i>                | member 3       | XP_014402039.1   | Predicted |
|                                 | <i>Gorilla gorilla gorilla</i>        | member 3       | XP_004061693.1   | Predicted |
|                                 | <i>Pan troglodytes</i>                | member 3       | XP_009434927.1   | Predicted |
| <i>Macaca mulatta</i>           | member 2                              | NP_001181490.1 | Predicted        |           |
| <i>Panthalops hodgsonii</i>     | member 3                              | XP_005981822.1 | Predicted        |           |
| Fungi                           | <i>Saccharomyces cerevisiae</i>       |                | NP_014951.4      | [3]       |
|                                 | <i>Arthroderma otae</i>               |                | XP_002843476.1   | Predicted |
|                                 | <i>Colletotrichum fioriniae</i>       |                | XP_007594293.1   | Predicted |
|                                 | <i>Colletotrichum gloeosporioides</i> |                | XP_007279280.1   | Predicted |
|                                 | <i>Eutypa lata</i>                    |                | XP_007792122.1   | Predicted |
|                                 | <i>Fibroporia radiculosa</i>          |                | XP_012184704.1   | Predicted |
|                                 | <i>Gaeumannomyces graminis</i>        |                | XP_009221625.1   | Predicted |
|                                 | <i>Magnaporthe oryzae</i>             | MCH5           | XP_003716530.1   | Predicted |
|                                 | <i>Marssonina brunnea</i>             |                | XP_007296567.1   | Predicted |
|                                 | <i>Microsporium gypseum</i>           |                | XP_003169176.1   | Predicted |
|                                 | <i>Ogataea parapolyomorpha</i>        |                | XP_013933620.1   | Predicted |
|                                 | <i>Paracoccidioides lutzii</i>        |                | XP_002797527.1   | Predicted |
|                                 | <i>Verticillium alfalfa</i>           |                | XP_003000372.1   | Predicted |
|                                 | <i>Verticillium dahlia</i>            |                | XP_009648470.1   | Predicted |
| <i>Wickerhamomyces ciferrii</i> |                                       | XP_011271917.1 | Predicted        |           |
| Nematodes                       | <i>Caenorhabditis elegans</i>         |                | CCD69385.2       | [4]       |
|                                 | <i>Brugia malayi</i>                  |                | XP_001896372.1   | Predicted |
|                                 | <i>Loa loa</i>                        | rft            | XP_003145255.1   | Predicted |
|                                 | <i>Necator americanus</i>             |                | XP_013300104.1   | Predicted |
|                                 | <i>Trichinella spiralis</i>           |                | XP_003380128.1   | Predicted |

The sequences were obtained from the NCBI Protein database annotated as predicted riboflavin transporters. Function has not been established for the entries with the exception of transporters belonging to *H. sapiens*, *M. musculus*, *C. elegans* and *S. cerevisiae*.

### Supplementary References

1. Yonezawa A, Inui KI. Novel riboflavin transporter family RFVT/SLC52: Identification, nomenclature, functional characterization and genetic diseases of RFVT/SLC52. *Mol Aspects Med.* 2013;34: 693–701. doi:10.1016/j.mam.2012.07.014
2. Yao Y, Yonezawa A, Yoshimatsu H, Omura T, Masuda S, Matsubara K. Involvement of riboflavin transporter RFVT2/Slc52a2 in hepatic homeostasis of riboflavin in mice. *Eur J Pharmacol.* 2013;714: 281–7. doi:10.1016/j.ejphar.2013.07.042
3. Reihl P, Stolz J. The monocarboxylate transporter homolog Mch5p catalyzes riboflavin (vitamin B2) uptake in *Saccharomyces cerevisiae*. *J Biol Chem.* 2005;280: 39809–39817. doi:10.1074/jbc.M505002200
4. Biswas A, Elmatari D, Rothman J, LaMunyon CW, Said HM. Identification and functional characterization of the *Caenorhabditis elegans* riboflavin transporters rft-1 and rft-2. *PLoS One.* 2013;8: e58190. doi:10.1371/journal.pone.0058190
