# Supplementary material for: The superfamily keeps growing: Identification in trypanosomatids of RibJ, the first riboflavin transporter family in protists
Source: PubMed Central journal article supplement (PMC5404878; doi:10.1371/journal.pntd.0005513), 2017-04-13
Supplement: pntd.0005513.s012.pdf [file pntd.0005513.s012.pdf]

S5 Table. Comparison between human and *T. cruzi* riboflavin transporter sequences.

|                 |                           | <i>H. sapiens</i> |              |                  |              |                  |              |
|-----------------|---------------------------|-------------------|--------------|------------------|--------------|------------------|--------------|
|                 |                           | RFVT1 (Q9NWF4.2)  |              | RFVT2 (Q9HAB3.1) |              | RFVT3 (Q9NQ40.4) |              |
|                 |                           | % identity        | % similarity | % identity       | % similarity | % identity       | % similarity |
| <i>T. cruzi</i> | TcRibJ (TcCLB.509885.70 ) | 18,5              | 28,5         | 19,0             | 30,9         | 18,1             | 30,1         |
|                 | TcRibJ (TcCLB.508397.70 ) | 18,9              | 28,9         | 19,5             | 30,8         | 18,4             | 29,3         |
